# Supplementary material for: NiS nanosheets with novel structure anchored on coal-based carbon fibers prepared by electrospinning for flexible supercapacitors
Source: Royal Society of Chemistry journal article supplement (doi:10.1039/c9ce01560d), 2019-11-14
Supplement: c9ce01560d1.pdf [file c9ce01560d1.pdf]

## Supplementary data

### NiS nanosheets with novel appearance anchored on coal-based carbon fibers prepared by electrospinning for flexible supercapacitors

Fenglian Tong, Xueyan Wu, Wei Jia, Jixi Guo,\* Yanliang Pan, Yan Lv, Dianzeng Jia,\*  
Xiaojuan Zhao

*Laboratory of Energy Materials Chemistry, Ministry of Education; Key Laboratory of  
Advanced Functional Materials, Autonomous Region; Institute of Applied Chemistry,  
Xinjiang University, Urumqi, 830046, Xinjiang P. R. China. Email:  
jxguo1012@163.com; jdz@xju.edu.cn; Fax: +86-991-8588883; Tel: +86-991-  
8583083.*

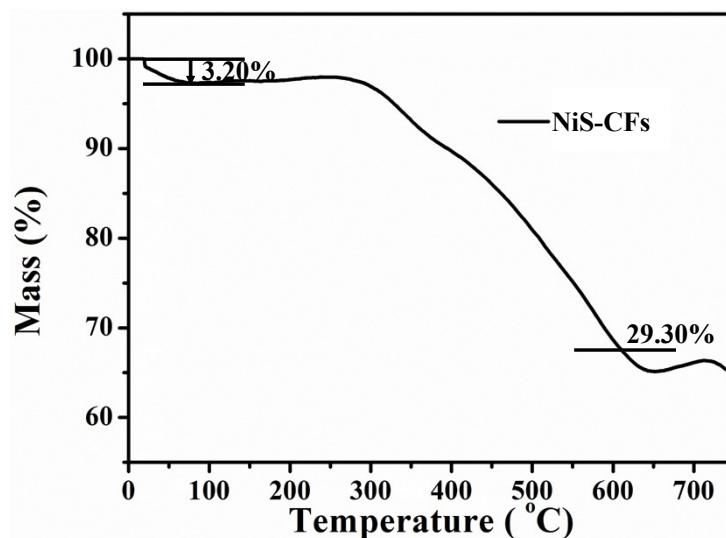

**Figure S1.** The TG curves of the as-prepared NiS-CFs composites.

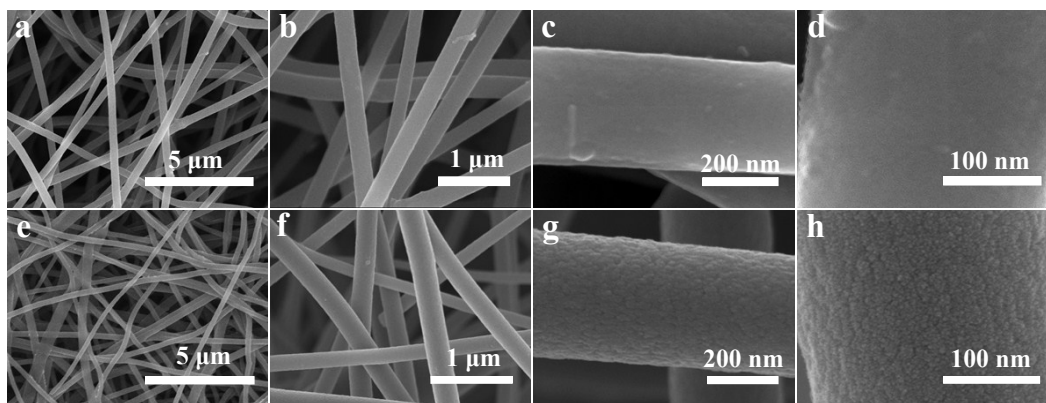

**Figure S2.** SEM images of the samples (a, b, c, d) CFs0 and (e, f, g, h) SiO<sub>2</sub>-CFs.

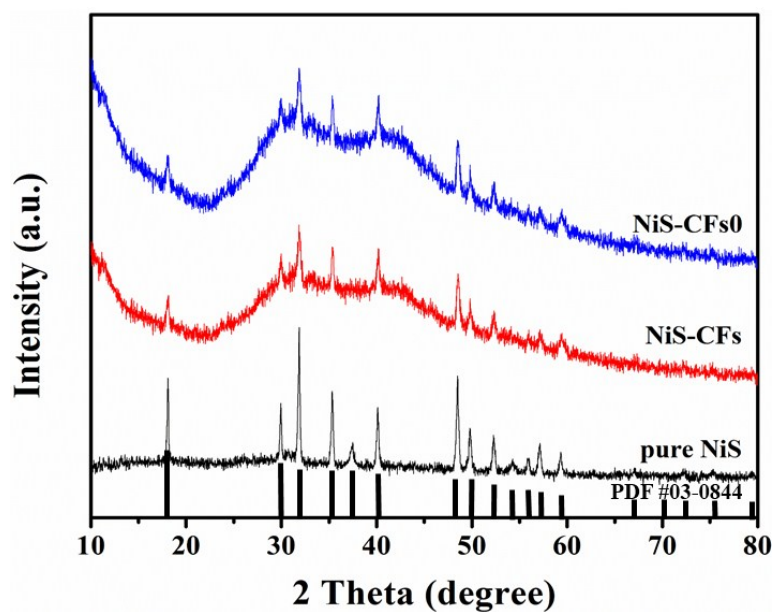

**Figure S3.** XRD patterns of NiS-CFs0, NiS-CFs and pure NiS.

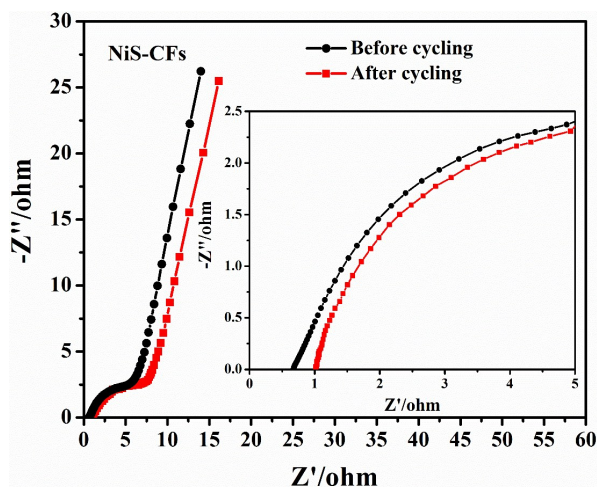

**Figure S4.** EIS spectrums of NiS-CFs before and after cycling process, the inset is the magnification Nyquist plots.

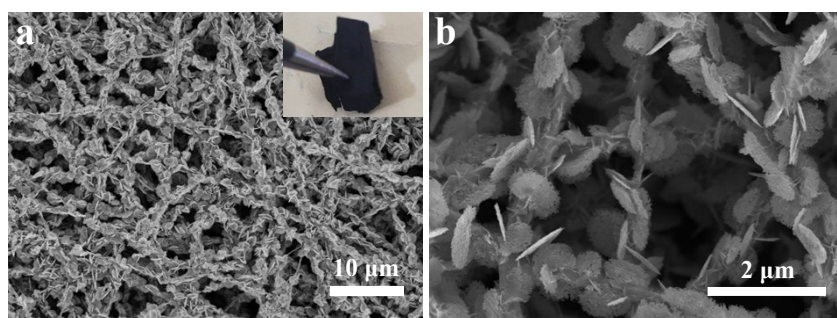

**Figure S5.** SEM images of the NiS-CFs composites after cycling. The inset is flexibility images of NiS-CFs after 5000 cycles.

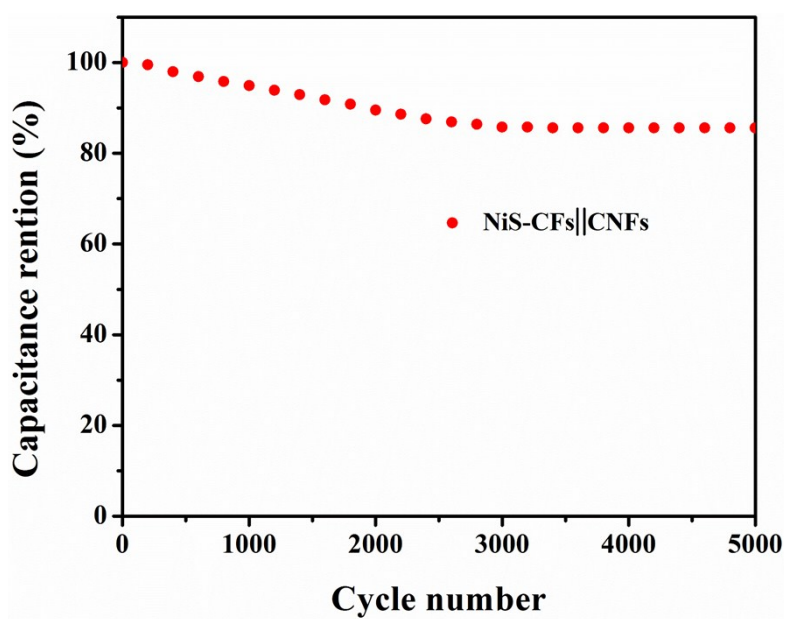

**Figure S6.** Cycling performance of NiS-CFs||CNFs device at a constant current density of  $1.0 \text{ A g}^{-1}$ .
